1  
2  
3  
4  
5  
6  
7  
8  
9  
10  
11  
12  
13  
14  
15  
16  
17  
18  
19  
20  
21  
22  
23  
24  
25  
26  
27  
28  
29  
30  
31  
32  
33  
34  
35  
36

## Structure of HIV-1 gp41 with its membrane anchors targeted by neutralizing antibodies

Christophe Caillat<sup>1,†</sup>, Delphine Guilligay<sup>1,†</sup>, Johana Torralba<sup>2</sup>, Nikolas Friedrich<sup>3</sup>, Jose L. Nieva<sup>2</sup>,  
Alexandra Trkola<sup>3</sup>, Christophe Chipot<sup>4,5,6</sup>, François Dehez<sup>4,5</sup> and Winfried Weissenhorn<sup>1\*</sup>

<sup>1</sup> Univ. Grenoble Alpes, CEA, CNRS, Institut de Biologie Structurale (IBS), 71, avenue des  
Martyrs, 38000 Grenoble, France.

<sup>2</sup> Biofisika Institute (CSIC, UPV/EHU) and Department of Biochemistry and Molecular Biology,  
University of the Basque Country (UPV/EHU), 48080, Bilbao, Spain.

<sup>3</sup> Institute of Medical Virology, University of Zurich, 8057 Zurich, Switzerland.

<sup>4</sup> Laboratoire de Physique et Chimie Théoriques (LPCT), University of Lorraine, CNRS,  
Boulevard des Aiguillettes, 54506 Vandoeuvre-lès-Nancy Cedex, France.

<sup>5</sup> Laboratoire International Associé, CNRS and University of Illinois at Urbana-Champaign, 54506  
Vandoeuvre-lès-Nancy Cedex, France.

<sup>6</sup> Department of Physics, University of Illinois at Urbana-Champaign, 1110 West Green Street,  
Urbana, Illinois 61801, USA.

† These authors contributed equally

\*Correspondence to: [winfried.weissenhorn@ibs.fr](mailto:winfried.weissenhorn@ibs.fr)

## 37 **Abstract**

38  
39 The HIV-1 gp120/gp41 trimer undergoes a series of conformational changes in order to catalyze  
40 gp41-induced fusion of viral and cellular membranes. Here, we present the crystal structure of gp41  
41 locked in a fusion intermediate state by an MPER-specific neutralizing antibody. The structure  
42 illustrates the conformational plasticity of the six membrane anchors arranged asymmetrically with  
43 the fusion peptides and the transmembrane regions pointing into different directions. Hinge regions  
44 located adjacent to the fusion peptide and the transmembrane region facilitate the conformational  
45 flexibility that allows high affinity binding of broadly neutralizing anti-MPER antibodies.  
46 Molecular dynamics simulation of the MPER Ab-induced gp41 conformation reveals the transition  
47 into the final post-fusion conformation with the central fusion peptides forming a hydrophobic core  
48 with flanking transmembrane regions. This, thus, suggests that MPER-specific broadly neutralizing  
49 antibodies can block final steps of refolding of the fusion peptide and the transmembrane region,  
50 which is required for completing membrane fusion.

## 51 **Introduction**

52  
53  
54 Viral fusion proteins catalyze virus entry by fusing the viral membrane with cellular  
55 membranes of the host cell, thereby establishing infection. The HIV-1 envelope glycoprotein (Env)  
56 is a prototypic class I fusion protein that shares common pathways in membrane fusion with class  
57 II and III viral membrane fusion proteins<sup>1-4</sup>. HIV-1 Env is expressed as a gp160 precursor  
58 glycoprotein that is cleaved into the fusion protein subunit gp41 and the receptor binding subunit  
59 gp120 by host furin-like proteases. Gp41 anchors Env to the membrane and associates non-  
60 covalently with gp120, thereby forming a stable trimer of heterodimers, the metastable Env  
61 prefusion conformation<sup>5,6</sup>. Orchestration of a series of conformational changes transforms energy-  
62 rich prefusion Env into the low-energy, highly stable gp41 post-fusion conformation, which  
63 provides the free energy to overcome the kinetic barriers associated with bringing two opposing  
64 membranes into close enough contact to facilitate membrane fusion<sup>2,3</sup>.

65 HIV-1 gp41 is composed of several functional segments that have been shown or suggested  
66 to extensively refold upon fusion activation: the N-terminal fusion peptide (FP), a fusion peptide  
67 proximal region (FPPR), the heptad repeat region 1 (HR1), a loop region followed by HR2, the  
68 membrane proximal external region (MPER), the transmembrane region (TMR), and a cytoplasmic  
69 domain. Structures of native Env trimers in complex with different broadly neutralizing antibodies  
70 revealed the conformation of the gp41 ectodomain lacking MPER in the native prefusion  
71 conformation<sup>7-12</sup>. Env interaction with CD4 results in opening of the closed prefusion trimer<sup>13,14</sup>,

72 which includes the displacement of gp120 variable regions 1 and 2 (V1-V2) at the apex of the trimer  
73 but no changes in gp41<sup>15</sup>. This is required for the formation of a stable ternary complex of Env-  
74 CD4 with the co-receptor<sup>16-18</sup>. Co-receptor binding positions prefusion gp41 closer to the host-cell  
75 membrane<sup>5</sup> and induces a cascade of conformational changes in gp41. First, the fusion peptide is  
76 repositioned by  $\sim 70 \text{ \AA}$ <sup>9</sup> to interact with the target cell membrane, generating a  $110 \text{ \AA}$  extended  
77 fusion-intermediate conformation<sup>19,20</sup> that bridges the viral and the host cell membrane<sup>21</sup>.  
78 Subsequent refolding of HR2 onto HR1 leads to the formation of the six-helix bundle core structure  
79<sup>22-24</sup>, which pulls the viral membrane into close apposition to the host-cell membrane and, thus, sets  
80 the stage for membrane fusion<sup>22</sup>.

81 Membrane fusion generates a lipid intermediate hemifusion state, that is predicted to break  
82 and evolve to fusion pore opening<sup>25</sup>, which is regulated by six-helical bundle formation<sup>26,27</sup>.  
83 Furthermore residues within FPPR, FP, MPER and TM have been as well implicated in fusion<sup>28-32</sup>  
84 indicating that final steps in fusion are controlled by the conformational transitions of the membrane  
85 anchors into the final post-fusion conformation.

86 Here, we set out to understand the conformational transitions of the gp41 membrane  
87 anchors. We show that the presence of the membrane anchors increases thermostability. However,  
88 complex formation with a MPER-specific neutralizing nanobody induced an asymmetric  
89 conformation of the membrane anchors, which constitutes a late fusion intermediate. We show that  
90 this conformation can be targeted by MPER bnAbs consistent with the possibility that MPER-  
91 specific nAbs can interfere all along the fusion process until a late stage. Starting from the  
92 asymmetric conformation, we used MD simulation based modelling to generate the final post-  
93 fusion conformation, which reveals a tight helical interaction of FP and TM in the membrane  
94 consistent with its high thermostability. Our work, thus, elucidates the structural transitions of the  
95 membrane anchors that are essential for membrane fusion, which can be blocked by MPER-specific  
96 bnAbs up to a late stage in fusion.

97

## 98 **Results**

99

### 100 **Gp41FP-TM interaction with 2H10.**

101 Two gp41 constructs, one containing residues 512 to 581 comprising FP, FPPR and HR1 (N-  
102 terminal chain, chain N) and one coding for residues 629 to 715 including HR2, MPER and TM (C-  
103 terminal chain, chain C)( **Fig. S1A**) were expressed separately, purified and assembled into the  
104 monodisperse trimeric complex gp41FP-TM (**Fig. S1B**). Gp41FP-TM reveals a thermostability of  
105  $> 95^\circ\text{C}$  as measured by circular dichroism (**Fig. S2A**) indicating that the presence of FP and TMR

106 increases the thermostability by  $> 7^{\circ}\text{C}$  compared to gp41 lacking FP and TM<sup>33</sup>. In order to facilitate  
107 crystallization, gp41FP-TM was complexed with the llama nanobody 2H10<sup>34</sup> in  $\beta$ -OG buffer and  
108 purified by size exclusion chromatography (SEC)(**Fig. S1C**). To determine the stoichiometry of  
109 binding, we performed isothermal titration calorimetry (ITC), which indicated that gp41FP-TM and  
110 2H10 form a 3:1 complex with a  $K_D$  of  $2.1 \pm 0.9 \mu\text{M}$  (**Fig. S2B**). Interaction of gp41FP-TM with  
111 2H10 was further confirmed by biolayer interferometry (BLI) analysis (**Fig. S2C**).

### 112 113 **Crystal structure of gp41 in complex with 2H10**

114 The structure of gp41FP-TM in complex with 2H10 was solved by molecular replacement to a  
115 resolution of  $3.8 \text{ \AA}$  (**Table S1**). The asymmetric unit contained trimeric gp41FP-TM bound to one  
116 2H10 nanobody as indicated by ITC (**Fig. S2B**). The six-helix bundle structure composed of three  
117 N-terminal and three C-terminal chains is conserved from HR1 residue A541 to HR2 residue L661  
118 in all three protomers, and identical to previous structures<sup>22,23</sup>. However, TMR and FP do not follow  
119 the three-fold symmetry and their chains point into opposite directions (**Fig. 1A**). 2H10 interacts  
120 with chain C-A (**Fig. 1A and B**) and induces a partially extended MPER conformation, including  
121 a kink at L669 that positions the rest of MPER and TM (N674 to V693) at a  $45^{\circ}$  angle with respect  
122 to the six-helix threefold symmetry axis. The corresponding N-terminal chain A (chain N-A) has  
123 its FP disordered and FPPR from G527 to A533 is flexible, while the remaining FPPR and HR1  
124 form a continuous helix (**Fig. 1C**). The chain C-A 2H10 epitope spans from residues Q658 to N671,  
125 which is involved in a series of polar contacts with 2H10. These include interactions of gp41FP-  
126 TM E662 to 2H10 Y37, S668 and the carbonyl of D664 to R56, K665 to E95, N671 and the  
127 carbonyl of A667 to R54, K655 to R97 and R93 contacts E95 to position it for interaction with  
128 K665 (**Fig. 1B**). Notably, mutations of R56, R93, E95 and R97 have been shown to affect  
129 interaction<sup>34</sup>. Chain N-B of the second protomer forms a long continuous helix comprising FP,  
130 FPPR and HR1 from residues L518 to D589 with the first six residues of FP being disordered.  
131 Likewise, chain C-B folds into a continuous helix from M629 to A700 comprising HR2, MPER  
132 and TM (**Fig. 1D**).  $C\alpha$  superimposition of chain C-B with MPER containing gp41 structures<sup>33,35</sup>  
133 yields root mean-square deviations of  $0.55 \text{ \AA}$  and  $0.29 \text{ \AA}$  (**Fig. S3**), indicating that the straight  
134 helical conformation is the preferred conformation in threefold symmetrical gp41. In the third  
135 protomer, chain N-C has a helical FP linked by flexible residues G531 to A533 to a short helix of  
136 FPPR that bends at A541 with respect to helical HR1. Its corresponding chain C-C contains helical  
137 HR2 and a flexible region from N671 to N674, which stabilizes a  $\sim 45^{\circ}$  rotation of the remaining  
138 MPER-TM helix that extends to residue R707 (**Fig. 1E**). Thus, the structure reveals flexible regions  
139 within FPPR and MPER. FPPR flexibility is supported by strictly conserved G528 and G531, while

140 MPER has no conserved glycine residues. However, the same kink within L661 to F673 has been  
141 observed in the MPER peptide structure <sup>36</sup>, and in complex with bnAb 10E8 <sup>37</sup>. The N-terminal FP  
142 residues 512 to 517 are disordered within the detergent micelle. Flexibility of this region in the  
143 absence of membrane is consistent with NMR peptide structures that propose a flexible coil  
144 structure of the N-terminal part of FP in solution followed by a helical region starting at L518 <sup>38</sup> as  
145 observed here. Based on the flexible linkage of FP and TMR, we propose that both FPPR and  
146 MPER act as hinges during gp41 refolding leading to membrane fusion.

### 148 **MD simulation of gp41FP-TM in a lipid bilayer**

149 In order to test whether the structure is influenced by the presence of the detergent, we probed its  
150 stability by MD simulation in a bilayer having the lipid composition of the HIV-1 envelope. This  
151 confirmed that the structure is stable in a membrane environment during a 1  $\mu$ s simulation as only  
152 the flexibly linked FP of chain N-C moves within the bilayer during the simulation (**Fig. S4A and**  
153 **B**). The tip of the 2H10 CDR3 dips into the bilayer (**Fig. S4B**), hence confirming the membrane-  
154 anchoring role of W100 for neutralization <sup>34</sup>.

### 156 **Neutralization activity of 2H10 depends on membrane interaction**

157 The structure suggests that 2H10 induced the asymmetry within the membrane anchors. Crystal  
158 packing effects on the conformation can be excluded, because only the C-terminus of the chain C-  
159 C helix is involved in crystal lattice contacts (**Fig. S5**). We therefore further evaluated 2H10 as a  
160 neutralizing nanobody, which showed modest neutralization as a bi-head (bi-2H10), whereas  
161 neutralization depended on W100 located at the tip of CDR3 <sup>34</sup>, a hall mark of MPER-specific  
162 bnAbs <sup>39</sup>. In order to improve the breadth and potency of monovalent 2H10, we increased its  
163 membrane interaction capacity by changing CDR3 S100d to F (2H10-F) alone and in combination  
164 with additional basic residues S27R, S30K and S74R (2H10-RKRF) within the putative 2H10  
165 membrane-binding interface suggested by MD simulation (**Fig. S4C**). Wild type 2H10 did not show  
166 significant neutralization against a panel of 10 clade B pseudo-viruses as shown previously <sup>34</sup>, with  
167 the exception of some weak neutralization of NL4-3 and SF163P3. However, both 2H10-F and  
168 2H10-RKRF show improved potency and breadth neutralizing six and eight pseudo-viruses,  
169 respectively, albeit with less potency than wild-type bi-2H10 and bnAb 2F5, the latter recognizing  
170 an overlapping epitope (**Table 1**). This result, thus, confirms monovalent 2H10 as a modest anti-  
171 MPER Ab that neutralizes by engaging MPER and the membrane.

### 173 **2H10 blocks fusion before the stage of lipid mixing**

174 The efficacy of bi-2H10 and 2H10-RKRF for blocking membrane merging was further assessed in  
175 peptide-induced lipid-mixing assays, whereas a vesicle population is primed for fusion by addition  
176 of the N-MPER peptide containing the 2H10 epitope, which produces a fluorescence intensity spark  
177 at time 20 s (**Fig. 2A**)<sup>40</sup>. Under these experimental conditions, incorporation of the peptide into the  
178 vesicles takes less than 10 sec<sup>40</sup>. After 120 sec, the mixture was supplemented with target vesicles  
179 fluorescently labeled with N-NBD-PE/N-Rh-PE (indicated by the arrow in **Fig. 2A**). The increase  
180 in NBD intensity as a function of time followed the mixing of the target vesicle lipids with those of  
181 the unlabeled vesicles (kinetic trace labeled '+N-MPER'). The increase in NBD fluorescence was  
182 not observed when labeled target vesicles were injected in a cuvette containing unlabeled vesicles  
183 not primed with peptide ('no peptide' trace). Lipid mixing was strongly attenuated when the  
184 vesicles primed for fusion with N-MPER were incubated with bi-2H10 before addition of the target  
185 vesicles (**Fig. 2A**, +N-MPER/+bi-2H10, dotted trace). Thus, the N-MPER-induced membrane  
186 perturbations, which can induce fusion with target membranes, were inhibited by incubation with  
187 bi-2H10. Comparison of the kinetics of the lipid-mixing blocking effect of 2H10-RKRF, bi-2H10  
188 and the 2F5 Fab showed that the three antibodies inhibited both the initial rates and final extents of  
189 lipid mixing induced by N-MPER (**Fig. 2B**). Using a control MPER peptide lacking the 2H10 and  
190 2F5 epitopes for vesicle priming no inhibition of lipid mixing by 2H10-RKRF, bi-2H10 and 2F5  
191 Fab was observed (**Fig. 2C**), indicating that the inhibitory effects depend on epitope recognition.  
192 Fusion inhibition levels estimated as a function of the antibody concentration further confirmed the  
193 apparent higher potency exhibited by the bi-2H10 (**Fig. 2D**). Lower concentrations of bi-2H10  
194 compared to 2H10-RKRF were required to attain full blocking of the lipid-mixing process when  
195 measured 20 sec (initial rates) or 300 sec (final extents) after target-vesicle injection (**Fig. 2D and**  
196 **E**). The higher inhibitory potency of bi-2H10 indicates an avidity effect, which was also evident  
197 when the concentration of the epitope-binding fragments was plotted (**Fig. 2D and E**, empty  
198 squares and dotted line). Moreover, bi-2H10 appeared to block efficiently the process even at  
199 2H10:N-MPER ratios below 1:3 (mol:mol), consistent with the involvement of peptide oligomers  
200 in the promotion of membrane fusion. Based on these data, we suggest that both 2H10-RKRF and  
201 bi-2H10 neutralize HIV-1 at the stage of lipid mixing.

202

### 203 **GP41FP-TM interaction with MPER bnAbs**

204 Although the 2H10 epitope overlaps with the 2F5 MPER epitope<sup>41</sup>, the 2F5-bound peptide  
205 structure<sup>41</sup>, cannot be superimposed without major clashes with adjacent gp41 protomers. In  
206 contrast, Ca superposition of the structures of 10E8 and LN01 in complex with MPER peptides  
207 demonstrated possible binding to gp41FP-TM chain C-C (**Fig. 3A and B**). Furthermore, HCDR3



208 of both 10E8 and LN01 could make additional hydrophobic contacts with adjacent FP in this  
209 binding mode. To confirm 10E8 and LN01 interaction, we performed immunoprecipitation of  
210 gp41FP-TM with both bnAbs, which confirmed their interaction *in vitro* (**Fig. S2D**). We next  
211 validated binding by bio-layer interferometry (BLI) using gp41FP-TM as analyte. This revealed  
212  $K_{DS}$  of 0,2 nM for 10E8 and 34 nM for LN01 (**Fig. 3C and D**). We conclude that bnAbs 10E8 and  
213 LN01 interact with gp41FP-TM with high affinity likely by inducing and stabilizing an asymmetric  
214 gp41 conformation similar to the one observed in complex with 2H10 as suggested by the structural  
215 modeling (**Fig. 3 and B**).

216

### 217 **Building a post fusion conformation by MD simulation**

218 In order to follow the final refolding of the membrane anchors we modeled the post fusion  
219 conformation employing MD simulation. Assuming that the final post-fusion conformation shows  
220 a straight symmetric rod-like structure we constructed a model of gp41 from the protomer  
221 composed of the straight helical chains N-B and C-B (**Fig. S6A and B**). This conformation is also  
222 present in the symmetric six-helix bundle structures containing either MPER<sup>35</sup> or FPPR and MPER  
223<sup>33</sup> (**Fig. S3**). In this model, FP and TM do not interact tightly (**Fig. S6B**), which, however, does not  
224 explain the increased thermostability induced by FP and TM (**Fig. S2A**). 1- $\mu$ s MD simulation of  
225 this model (**Fig. S6B**) in solution, rearranges the membrane anchors such that they adopt a compact  
226 structure with trimeric FP interacting with adjacent TMs. Furthermore, the TMs kink at the  
227 conserved Gly positions 690 and 691, as observed previously<sup>42</sup> (**Fig. S6C**). In order to recapitulate  
228 the stability of the model in the membrane, we performed an additional 1- $\mu$ s MD simulation of the  
229 model (**Fig. S6C**) in a bilayer resembling the HIV-1 lipid composition, which relaxed the TM to its  
230 straight conformation (**Fig. 4A**). The final structural model reveals tight packing of trimeric FP  
231 flexibly linked to HR1 by FPPR G525 to G527 (**Fig. 4B**). HR2-MPER and TMR form continuous  
232 helices with the TMRs packing against trimeric FP (**Fig. 4A and C**), which spans one monolayer  
233 (**Fig. 4A**). As conserved tryptophan residues within MPER have been previously implicated in  
234 fusion<sup>28,30</sup>, we analyzed their structural role in the post fusion model. This reveals that the indole  
235 ring of W666 is sandwiched between Leu669 and T536 and packs against L537. W670 makes a  
236 coiled-coil interaction with S534, while W672 is partially exposed and packs against L669 and  
237 T676. W678 binds into a hydrophobic pocket defined by I675, L679, I682 and adjacent FP/FPPR  
238 residues F522 and A526. W680 is partially exposed, but reaches into a pocket created by the flexible  
239 FPPR coil (**Fig. S7**). Thus, most of the tryptophan residues have structural roles in the post-fusion  
240 conformation, hence providing an explanation for their functional role in fusion<sup>28</sup>. The MPER  
241 epitopes recognized by 10E8 and LN01 are exposed in the post-fusion model, but antibody docking

242 to this conformation produced major clashes, consistent with no expected binding to the final post  
243 fusion conformation.

### 244 245 **Structural transitions of gp41**

246 A number of Env SOSIP structures revealed the native conformation of gp41 (**Fig. 5A and**  
247 **C**)<sup>9,43,44</sup>. The gp41FP-TM crystal structure and the model of its post fusion conformation provide  
248 further insight into the path of conformational changes that native gp41 must undergo to adopt its  
249 final lowest energy state conformation. The first major conformational changes in gp41 that take  
250 place upon receptor binding are extension of HR1, FPPR and FP into a triple stranded coiled coil  
251 with flexible linkers between FPPR and FP that projects FP ~115 Å away from its starting position  
252 (**Fig. 5D**). Notably, such an early intermediate fusion conformation structure has been reported for  
253 influenza hemagglutinin (HA)<sup>45</sup>. This is likely followed by an extension and rearrangement of HR2  
254 and MPER producing 11-15-nm long intermediates that connect the viral and cellular membranes  
255<sup>20,46</sup>. Gp41 refolding into the six-helix bundle structure then produces flexibly linked asymmetric  
256 conformations of FPPR-FP and MPER-TMR anchored in the cellular and viral membranes,  
257 respectively, as indicated by the gp41FP-TM structure. This intermediate conformation may bring  
258 viral and cellular membranes into close proximity (**Fig. 5E**) or may act at the subsequent stage of  
259 hemifusion (**Fig. 5F**). Further refolding and interaction of FP-FPPR and MPER-TM will generate  
260 the stable post fusion conformation (**Fig. 5G**), a process that completes membrane fusion.

### 261 262 **Discussion**

263 Membrane fusion is an essential step of infection for enveloped viruses such as HIV-1, and requires  
264 extensive conformational rearrangements of the Env prefusion conformation<sup>7-9</sup> into the final  
265 inactive post-fusion conformation<sup>2,3</sup>. The fusion model predicts that six-helix bundle formation  
266 apposes viral and cellular membranes with FP and TM inserted asymmetrically in the cellular  
267 membrane and the viral membrane, respectively<sup>21</sup>. Here, we show that gp41 containing its  
268 membrane anchors can adopt this predicted conformation, which is facilitated by flexible hinges  
269 present in FPPR and MPER, thus corroborating their essential roles in membrane fusion<sup>3,5,47</sup>. The  
270 asymmetric conformation of the membrane anchors suggest further that bundle formation occurs  
271 before pore formation as suggested previously<sup>26,27</sup>. The membrane-fusion model proposes further  
272 that final steps in fusion involves rearrangement and interaction of TM and FP<sup>21</sup>, which is  
273 confirmed by the MD-simulation model of the post-fusion conformation. Furthermore, the length  
274 of the rod-like post-fusion structure of 13 nm lacking the C-C loop is consistent with the gp41  
275 structure lacking FP and TM<sup>48</sup>.



276 FP is helical in the gp41FP-TM-2H10 complex and the MD-based post-fusion  
277 conformation, in agreement with NMR-based helical FP peptide models<sup>49,50</sup>, although  $\beta$ -strand  
278 structures of FP have been implicated in fusion as well<sup>51</sup>. In comparison, in native Env  
279 conformations, FP adopts multiple dynamic conformations that are recognized by broadly  
280 neutralizing antibodies<sup>43,44,52,53</sup>. In the post-fusion conformation, FP spans one monolayer of the  
281 membrane, in contrast to suggested amphipathic helix-like interaction of FP with the outer layer of  
282 the target cell membrane<sup>54,55</sup>.

283 Furthermore, the coiled-coil interactions within FP and with TM in the post fusion model  
284 explain the increased thermostability of gp41FP-TM compared to gp41 lacking FP and TM<sup>33</sup>. We  
285 propose that refolding of FP and TM can liberate additional free energy to catalyze final steps of  
286 fusion. Hence, replacement of TM by a phosphatidylinositol (PI) anchor inhibits membrane fusion  
287<sup>56,57</sup>, akin to the GPI-anchored HA inhibition of influenza virus membrane fusion at the stage of  
288 hemifusion<sup>58</sup>.

289 Mutations in MPER and FPPR interfere with fusion<sup>28,30,59,60</sup>, and mutations in TM block  
290 fusion<sup>31</sup> or reduce fusion efficiency<sup>32</sup>. Our structural model of the post-fusion conformation  
291 predicts that most of these mutations affect the final post-fusion conformation, in agreement with  
292 proposed interactions of FPPR and MPER, as well as FP and TM<sup>61,62</sup>, thereby corroborating their  
293 essential roles at late stages of membrane fusion.

294 Gp41FP-TM interaction with the 2H10 MPER-specific nanobody induces the asymmetric  
295 conformation of the membrane anchors. In order to confirm that 2H10 is, indeed, a neutralizing  
296 MPER-specific nanobody, we engineered increased 2H10 membrane binding, which improved  
297 breadth and potency of 2H10 neutralization, in agreement with enlarged potency by increasing  
298 membrane-binding of 10E8<sup>63-65</sup>. This result, thus confirmed 2H10 as a modest anti-MPER  
299 neutralizing antibody that recognizes both its linear epitope and membrane<sup>34</sup>. Consistent with its  
300 neutralization capacity, 2H10 inhibits membrane fusion at the stage of lipid mixing like 2F5 and  
301 other anti-MPER bnAbs<sup>40,66</sup>. Moreover, gp41FP-TM interacts with MPER bnAbs 10E8<sup>37</sup> and  
302 LN01<sup>42</sup> in agreement with docking both structures onto the kinked chain C-C MPER epitope.  
303 Notably, the kink in the MPER peptide in complex with 10E8<sup>37</sup> is similar to the chain C-C kink  
304 and present in MPER peptide NMR structures<sup>36,50</sup>. Furthermore, Ala mutations in the kink (671-  
305 674) affect cell-cell fusion and lower virus infectivity<sup>67</sup> corroborating the physiological relevance  
306 of the kinked conformation. We therefore propose that 10E8 and LN01 binding to gp41FP-TM  
307 induces similar asymmetry, as observed in the gp41FP-TM-2H10 structure by sampling the  
308 dynamic states of the membrane anchors.

309 Our data, thus, indicate that MPER antibodies can act all along the gp41 refolding pathway  
310 from blocking initial conformations of close to native Env<sup>68-70</sup> up to a late fusion intermediate state  
311 that has already pulled viral and cellular membranes into close apposition. This thus, opens a long  
312 temporal window of action for MPER bnAbs consistent with the findings that the half-life of  
313 neutralization of MPER bnAbs is up to 30 minutes post virus exposure to target cells<sup>71,72</sup>.  
314 Furthermore, only one Ab per trimer may suffice to block final refolding of the membrane anchors  
315 required for fusion. Finally, the presence of dynamic linkers connecting the core of viral fusion  
316 proteins with their membrane anchors FP and TM must be a general feature of all viral membrane  
317 fusion proteins.

318

## 319 **Materials and Methods**

320

### 321 **Cell Lines**

322 TZM-bl cells were obtained from NIH-AIDS Research and Reference Reagent Program (ARRRP)  
323 and used for neutralization assays. TZM-bl cells were maintained in Dulbecco's modified Eagle's  
324 medium supplemented with 10% fetal bovine serum, 100 units of Penicillin and 0.1 mg/ml of  
325 Streptomycin while TZM-bl expressing the FcγRI cells were maintained in Dulbecco's modified  
326 Eagle's medium supplemented with 10% fetal bovine serum, 0.025M Hepes, 50 μg/ml of  
327 Gentamicin, 20 μg/ml of Blasticidin.

328

### 329 **HIV-1 Primary Viruses**

330 Env-pseudotyped viruses were prepared by co-transfection of HEK 293-T cells with plasmids  
331 encoding the respective *env* genes and the luciferase reporter HIV vector pNLluc-AM as described  
332<sup>73</sup>. A full list of Env pseudotyped viruses generated with corresponding gene bank entry, subtype  
333 and Tier information is provided in Table S2.

334

### 335 **GP41 expression and purification**

336 DNA fragments encoding HIV-1 Env glycoprotein amino acids 512 to 581 (N-terminal chain, chain  
337 N) and residues 629 to 715 (C-terminal chain, chain C) were cloned into vectors pETM20 and  
338 pETM11 (PEPcore facility-EMBL), respectively. Both constructs contain an N-terminal Flag-tag  
339 (DDDDK sequence) and chain C contains additional two C-terminal arginine residues (Fig. S1A).  
340 Proteins were expressed separately in *E. coli* strain C41(DE3)(Lucigen). Bacteria were grown at  
341 37°C to an OD<sub>600nm</sub> of 0,9. Cultures were induced with 1mM IPTG at 37°C for 3h for gp41 chain  
342 N and at 25°C for 20h for gp41 chain C. Cells were lysed by sonication in buffer A containing 20

343 mM Tris pH 8, 100 mM NaCl and 1% CHAPS (3-[(3-cholamidopropyl) diméthylammonio]-1-  
344 propanesulfonate (Euromedex). The supernatant was cleared by centrifugation at 53 000 g for 30  
345 min. Gp41 chain N supernatant was loaded on a Ni<sup>2+</sup>-sepharose column, washed successively with  
346 Buffer A containing 1M NaCl and 1M KCl, then Buffer A containing 50 mM imidazole. Gp41  
347 chain N was eluted in Buffer A containing 500 mM imidazole. Gp41 chain C was purified  
348 employing the same protocol as for gp41 chain N. Gp41 chain N was subsequently cleaved with  
349 TEV (Tobacco Etch Virus) protease for 2h at 20°C and then overnight at 4°C. After buffer exchange  
350 with a mono Q column using buffer B (Buffer A with 0,5 M NaCl), uncleaved material and cleaved  
351 His-tags were removed by a second Ni<sup>2+</sup>-sepharose column in buffer A. TEV-cleaved gp41 chain  
352 C and chain N were then mixed in a molar ratio 4:1 and incubated overnight. To remove the excess  
353 of gp41 chain C, the gp41 complex was loaded on a 3rd Ni<sup>2+</sup>-sepharose column in buffer A, washed  
354 with buffer A containing 50 mM imidazole and eluted with buffer A containing 500 mM imidazole.  
355 Subsequently the gp41 chain N TrxA-His-tag was removed by TEV digestion for 2h at 20°C and  
356 overnight at 4°C. After buffer exchange with a mono Q column in buffer B uncleaved complex and  
357 the TrxA-His-tag fusion were removed by a 4th Ni<sup>2+</sup>-sepharose column. The final gp41FP-TM  
358 complex was concentrated and loaded onto a Superdex 200 size exclusion column (SEC) in buffer  
359 C containing 20 mM Tris pH 8,0, 100 mM NaCl and 1% n-octyl β-D-glucopyranoside (Anatrace).

360

### 361 **Nanobody 2H10 expression**

362 2H10 encoding DNA was cloned into the vector pAX51<sup>34</sup> and expressed in the *E. coli* BL21(DE3)  
363 strain (Invitrogen). Bacteria were grown at 37°C to an OD<sub>600nm</sub> of 0,7 and induced with 1mM IPTG  
364 at 20°C for 20h. After harvesting by centrifugation, bacteria were resuspended in lysis buffer  
365 containing 20 mM Hepes pH 7,5 and 100 mM NaCl. Bacteria were lysed by sonication and  
366 centrifuged at 48 000g for 30 min. Cleared supernatant was loaded on Protein A sepharose column,  
367 washed with lysis buffer and eluted with 0,1 M glycine pH 2,9. Eluted fractions were immediately  
368 mixed with 1/5 volume of 1M Tris pH 9,0. 2H10 was then further purified by SEC on a superdex  
369 75 column in PBS buffer. Mutants of 2H10, 2H10-F (S100d) and 2H10-RKRF (S27R, S30K, S74R  
370 and S100d) were synthesized (Biomatik) and purified as described for the wild type. The 2H10 bi-  
371 head was purified as described<sup>34</sup>.

372

### 373 **Circular dichroism**

374 CD measurements were performed using a JASCO Spectropolarimeter equipped with a  
375 thermoelectric temperature controller. Spectra of gp41-TM were recorded at 20 °C in 1 nm steps  
376 from 190 to 260 nm in a buffer containing PBS supplemented with 1% n-octyl β-D-

377 glucopyranoside. For thermal denaturation experiments, the ellipticity was recorded at 222 nm with  
378 1°C steps from 20° to 95°C with an increment of 80°C h<sup>-1</sup>, and an averaging time of 30 s/step. For  
379 data analysis, raw ellipticity values recorded at 222 nm were converted to mean residue ellipticity.

### 381 **Isothermal Titration Calorimetry (ITC)**

382 The stoichiometry and binding constants of 2H10 binding to gp41 FP-TM was measured by ITC200  
383 (MicroCal Inc.). All samples used in the ITC experiments were purified by SEC in a buffer  
384 containing 20 mM Tris pH 8.0, 100 mM NaCl and 1 % n-octyl β-D glucopyranoside and used  
385 without further concentration. Samples and were equilibrated at 25 °C before the start of the  
386 experiment. The ITC measurements were performed at 25 °C by making 20 2-μl injections of 267  
387 μM 2H10 to 0.2 ml of 19.5 μM gp41FP-TM. Curve fitting was performed with MicroCal Origin  
388 software. Three experiments were performed, with an average stoichiometry N = 1.1 +/- 0.2 2H10  
389 binds to gp41FP-TM with a KD of 2.1 μM +/- 0.9.

### 391 **Bio-layer Interferometry Binding Analysis**

392 Binding measurements between antibodies (10E8 IgG, LN01 IgG and 2H10) were carried out on  
393 an Octet Red instrument (ForteBio). For the determination of the binding between antibodies and  
394 gp41FP-TM, 10E8 IgG or LN01 IgG or 2H10 were labelled with biotin (EZ-Link NHS-PEG4-  
395 Biotin) and bound to Streptavidin (SA) biosensors (ForteBio). The biosensors loaded with the  
396 antibodies were equilibrated in the kinetic buffer (20 mM Tris pH 8.0, 100 mM NaCl and 1 % n-  
397 octyl β-D glucopyranoside) for 200-500 sec prior to measuring association with different  
398 concentrations of gp41FP- for 100-200 seconds at 25 °C. Data were analyzed using the ForteBio  
399 analysis software version 11.1.0.25 (ForteBio). For 10E8 the kinetic parameters were calculated  
400 using a global fit 1:1 model and 2:1 model. For the determination of the binding of LN01 IgG and  
401 2H10, KDs were estimated by steady state analysis. All bio-layer interferometry experiments were  
402 conducted at least three times.

### 404 **Immunoprecipitation of gp41FP-TM by bnAbs 10E8 and LN01**

405 220 μg of Gp41FP-TM were incubated alone or with 50μg of 10E8 or LN01 antibodies for 10 h at  
406 20°C in buffer C. The complex was loaded on Protein A sepharose affinity resin and incubated for  
407 1h. The resin was subsequently washed 3 times with buffer C and eluted with SDS gel loading  
408 buffer and boiling at 95°C for 5 min. Samples were separated on a 15% SDS-PAGE and stained  
409 with Coomassie brilliant blue.

## 411 **Neutralization assay**

412 The neutralization activity of the 2H10 variants and mAbs was evaluated using TZM-bl cells and  
413 Env pseudotyped viruses as described<sup>73</sup>. Briefly, serial dilutions of inhibitor were prepared in cell  
414 culture medium (DMEM with 10% heat-inactivated FBS, 100 U/ml penicillin and 100 µg/ml  
415 streptomycin (all from Gibco)) and added at a 1:1 volume ratio to pseudovirus suspension in 384  
416 well plates (aiming for 500'000–5'000'000 relative light units (RLU) per well in the absence of  
417 inhibitors). After one-hour incubation at 37°C, 30 µl of virus-inhibitor mixture was transferred to  
418 TZM-bl cells in 384 well plates (6000 cells/well in 30µl cell culture medium supplemented with  
419 20µg/ml DEAE-Dextran seeded the previous day). The plates were further incubated for 48 hours  
420 at 37°C before readout of luciferase reporter gene expression on a Perkin Elmer EnVision  
421 Multilabel Reader using the Bright-Glo Luciferase Assay System (Promega).

422 The inhibitor concentration (referring to the mix with cells, virus and inhibitor) causing 50%  
423 reduction in luciferase signal with respect to a reference well without inhibitor (inhibitory  
424 concentration IC50) was calculated by fitting a non-linear regression curve (variable slope) to data  
425 from two independent experiments using Prism (GraphPad Software). If 50% inhibition was not  
426 achieved at the highest inhibitor concentration tested, a greater than value was recorded. To control  
427 for unspecific effects all inhibitors were tested for activity against MuLV envelope pseudotyped  
428 virus.

## 430 **Fusion assay.**

431 The peptides used in the fusion inhibition experiments, NEQELLELDKWASLW  
432 NWFNITNWLWYIK (N-MPER) and KKK-NWFDITNWLWYIKLFIMIVGGLV-KK (C-MPER),  
433 were synthesized in C-terminal carboxamide form by solid-phase methods using Fmoc chemistry,  
434 purified by reverse phase HPLC, and characterized by matrix-assisted time-of-flight (MALDI-  
435 TOF) mass spectrometry (purity >95%). Peptides were routinely dissolved in dimethylsulfoxide  
436 (DMSO, spectroscopy grade) and their concentration determined by the Biscinchoninic Acid  
437 microassay (Pierce, Rockford, IL, USA).

438 Large unilamellar vesicles (LUV) were prepared following the extrusion method of Hope et al.<sup>74</sup>.  
439 1-palmitoyl-2-oleoylphosphatidylcholine (POPC) and cholesterol (Chol) (Avanti Polar Lipids,  
440 Birmingham, AL, USA) were mixed in chloroform at a 2:1 mol:mol ratio and dried under a N<sub>2</sub>  
441 stream. Traces of organic solvent were removed by vacuum pumping. Subsequently, the dried lipid  
442 films were dispersed in 5 mM Hepes and 100 mM NaCl (pH 7.4) buffer, and subjected to 10 freeze-  
443 thaw cycles prior to extrusion 10 times through 2 stacked polycarbonate membranes (Nuclepore,  
444 Inc., Pleasanton, CA, USA). Lipid mixing with fusion-committed vesicles was monitored based on

445 the resonance energy transfer assay described by Struck et al.<sup>75</sup>, with the modifications introduced  
446 by Apellaniz et al.<sup>40</sup>. The assay is based on the dilution of co-mixed N-(7-nitro-benz-2-oxa-1,3-  
447 diazol-4-yl)phosphatidylethanolamine (N-NBD-PE) and N-(lissamine Rhodamine B  
448 sulfonyl)phosphatidylethanolamine (N-Rh-PE) (Molecular Probes, Eugene, OR, USA), whereby  
449 dilution due to membrane mixing results in increased N-NBD-PE fluorescence. Vesicles containing  
450 0.6 mol % of each probe (target vesicles) were added at 1:9 ratio to unlabeled vesicles (MPER  
451 peptide-primed vesicles). The final lipid concentration in the mixture was 100  $\mu$ M. The increase in  
452 NBD emission upon mixing of target-labeled and primed-unlabeled lipid bilayers was monitored  
453 at 530 nm with the excitation wavelength set at 465 nm. A cutoff filter at 515 nm was used between  
454 the sample and the emission monochromator to avoid scattering interferences. The fluorescence  
455 scale was calibrated such that the zero level corresponded to the initial residual fluorescence of the  
456 labeled vesicles and the 100 % value to complete mixing of all the lipids in the system (i.e., the  
457 fluorescence intensity of vesicles containing 0.06 mol % of each probe). Fusion inhibition was  
458 performed with bi-2H10, 2H10-RKRF and 2F5 Fabs at concentrations of 10  $\mu$ g/ml and 20  $\mu$ g/ml  
459 as indicated.

460

### 461 **Crystallization, data collection and structure determination**

462 For crystallization, 1 mg of gp41FP-TM was mixed with 1.5 mg of 2H10. The complex was purified  
463 by SEC on a Superdex 200 column in a buffer containing 100 mM NaCl, 20 mM Tris pH 8,0 and  
464 1% n-octyl  $\beta$ -D-glucopyranoside and concentrated to 7-10 mg/ml. Crystal screening was performed  
465 at the EMBL High Throughput Crystallization Laboratory (HTX lab, Grenoble) in 96-well sitting  
466 drop vapor diffusion plates (Greiner). Following manual refinement of crystallization conditions,  
467 crystals of gp41FP-TM in complex with 2H10 were grown by mixing 1  $\mu$ l of protein with 1  $\mu$ l of  
468 reservoir buffer containing 0,1 M sodium citrate pH 6,0, 0,2 M ammonium sulfate, 20%  
469 polyethylene glycol 2000 and 0,1 M NaCl at 20°C (293 K) in hanging drop vapor diffusion plates.  
470 Before data collection, crystals were flash frozen at 100K in reservoir solution supplemented with  
471 1% n-octyl  $\beta$ -D-glucopyranoside and 25 % ethylene glycol for cryo-protection.

472 Data were collected on the ESRF beamline ID30b at a wavelength of 0.9730 Å. Data were  
473 processed with the program XDS<sup>76</sup>. The data from two crystals were merged with Aimless<sup>77</sup>. The  
474 data set displayed strong anisotropy in its diffraction limits and was submitted to the STARANISO  
475 Web server<sup>78</sup>. The merged STARANISO protocol produced a best-resolution limit of 3.28 Å and  
476 a worst-resolution limit of 4.74 Å at a cutoff level of 1.2 for the local  $I_{\text{mean}} / \sigma(I_{\text{mean}})$  (note that  
477 STARANISO does not employ ellipsoidal truncations coincident with the crystal axes). The  
478 gp41FP-TM-2H10 crystals belong to space group C 2 2 2<sub>1</sub> and the structure was solved by



479 molecular replacement using the program Phaser<sup>79</sup> and pdb entries 1env and 4b50. The model was  
480 rebuilt using COOT<sup>80</sup> and refined using Phenix<sup>81</sup>. Data up to 3.28 Å were initially used for model  
481 building but were finally truncated to 3.8 Å. Statistics for data reduction and structure refinement  
482 are presented in Table S1.

483 One copy of gp41FP-TM in complex with 2H10 are present in the asymmetric unit. Numbering of  
484 the nanobody 2H10 was performed according to Kabat. The gp41FP-TM-2H10 complex was  
485 refined to 3.8 Å data with an R/Rfree of 26.7 / 31.1 %. 99.6 % of the residues are within the most  
486 favored and allowed regions of a Ramachandran plot<sup>77</sup>. Some of the crystallographic software used  
487 were compiled by SBGrid<sup>82</sup>. Atomic coordinates and structure factors of the reported crystal  
488 structures have been deposited in the Protein Data Bank (<https://www.rcsb.org>; PDB: 7AEJ).

489

## 490 **Figure Generation**

491 Molecular graphics figures were generated with PyMOL (W. Delano; The PyMOL Molecular  
492 Graphics System, Version 1.8 Schrödinger, LLC, <http://www.pymol.org>).

493

## 494 **Molecular Dynamics (MD) simulation**

495 **Molecular assays.** Starting from the crystal structure determined herein, we built two molecular  
496 assays based (i) on the structure of the entire Gp41FP-TM/2H10 complex, and (ii) based on a gp41  
497 model generated by a three-fold symmetrization of the straight helical chains N-B and C-B.  
498 Electron density for FP and TM is partially absent in the crystal structure and the missing parts have  
499 been built as helical extensions; FP from residue 512 to 518 and TM from residues 700 to 709 based  
500 on TM structures (6SNE and 6B3U). All residues were taken in their standard protonation state.  
501 The first assay included a fully hydrated membrane composed of 190 cholesterol, 40 1-palmitoyl-  
502 2-oleoyl-glycero-3-phosphocholine (POPC), 88 1-palmitoyl-2-oleoyl-sn-glycero-3-phospho-  
503 ethanolamine (POPE), 36 1-palmitoyl-2-oleoyl-sn-glycero-3-phospho-L-serine (POPS) and 56 N-  
504 stearoyl sphingomyelin, present in the HIV-1 lipid envelope<sup>83</sup>, using the CHARMM-GUI interface  
505 <sup>84,85</sup>. The resulting molecular assembly consisted of about 178,000 atoms in a rhomboidal cell of  
506 106 x 106 x 169 Å<sup>3</sup>. The second computational assay featured a water bath of 91 x 91 x 114 Å<sup>3</sup>,  
507 representing a total of nearly 95,700 atoms. Both assays were electrically neutral, with a NaCl  
508 concentration set to 150 mM.

509 **Molecular Dynamics.** All simulations were performed using the NAMD 2.14 program<sup>86</sup>. Proteins,  
510 cholesterol, lipids and ions were described using the CHARMM forcefield<sup>87-89</sup> and the TIP3P  
511 model<sup>90</sup> was used for water. MD trajectories were generated in the isobaric-isothermal ensemble  
512 at a temperature of 300 K and a pressure of 1 atm. Pressure and temperature were kept constant

513 using the Langevin thermostat and the Langevin piston method <sup>91</sup>, respectively. Long-range  
514 electrostatic interactions were evaluated by the particle-mesh Ewald (PME) algorithm <sup>92</sup>. Hydrogen  
515 mass repartitioning <sup>93</sup> was employed for all simulations, allowing for using a time step of 4 fs.  
516 Integration was performed with a time step of 8 and 4 fs for long- and short-range interactions,  
517 respectively, employing the r-RESPA multiple time-stepping algorithm <sup>94</sup>. The SHAKE/RATTLE  
518 <sup>95,96</sup> was used to constrain covalent bonds involving hydrogen atoms to their experimental lengths,  
519 and the SETTLE algorithm <sup>97</sup> was utilized for water.

520 The computational assay formed by gp41 in an aqueous environment was simulated for a period of  
521 1  $\mu$ s, following a thermalization of 40 ns. For the gp41FP-TM/2H10 complex, the lipid bilayer was  
522 first thermalized during 200 ns using soft harmonic restraints on every dihedral angle of the protein  
523 backbones, allowing the complex to align optimally with its membrane environment. Following the  
524 equilibration step, a production run of 1  $\mu$ s was performed.

525 The final structure of the hydrated gp41 was also embedded in the HIV-1-like envelope membrane  
526 employed for the gp41FP-TM/2H10 complex. The same 200 ns equilibration protocol was applied  
527 followed by a production run of 1  $\mu$ s.

528

## 529 **References**

530

531

- 532 1. Kielian, M. & Rey, F.A. Virus membrane-fusion proteins: more than one way to make a  
533 hairpin. *Nat Rev Microbiol* **4**, 67-76 (2006).
- 534 2. Weissenhorn, W., Hinz, A. & Gaudin, Y. Virus membrane fusion. *FEBS Lett* **581**, 2150-5  
535 (2007).
- 536 3. Harrison, S.C. Viral membrane fusion. *Nat Struct Mol Biol* **15**, 690-698 (2008).
- 537 4. Baquero, E., Albertini, A.A. & Gaudin, Y. Recent mechanistic and structural insights on  
538 class III viral fusion glycoproteins. *Curr Opin Struct Biol* **33**, 52-60 (2015).
- 539 5. Chen, B. Molecular Mechanism of HIV-1 Entry. *Trends Microbiol* (2019).
- 540 6. Wang, Q., Finzi, A. & Sodroski, J. The Conformational States of the HIV-1 Envelope  
541 Glycoproteins. *Trends Microbiol* **28**, 655-667 (2020).
- 542 7. Julien, J.P. et al. Crystal Structure of a Soluble Cleaved HIV-1 Envelope Trimer. *Science*  
543 **342**, 1477-83 (2013).
- 544 8. Lyumkis, D. et al. Cryo-EM Structure of a Fully Glycosylated Soluble Cleaved HIV-1  
545 Envelope Trimer. *Science* **342**, 1484-90 (2013).
- 546 9. Pancera, M. et al. Structure and immune recognition of trimeric pre-fusion HIV-1 Env.  
547 *Nature* **514**, 455-61 (2014).
- 548 10. Kwon, Y.D. et al. Crystal structure, conformational fixation and entry-related interactions  
549 of mature ligand-free HIV-1 Env. *Nat Struct Mol Biol* **22**, 522-31 (2015).
- 550 11. Stewart-Jones, G.B. et al. Trimeric HIV-1-Env Structures Define Glycan Shields from  
551 Clades A, B, and G. *Cell* **165**, 813-26 (2016).
- 552 12. Ward, A.B. & Wilson, I.A. The HIV-1 envelope glycoprotein structure: nailing down a  
553 moving target. *Immunol Rev* **275**, 21-32 (2017).
- 554 13. Liu, J., Bartesaghi, A., Borgnia, M.J., Sapiro, G. & Subramaniam, S. Molecular  
555 architecture of native HIV-1 gp120 trimers. *Nature* **455**, 109-13 (2008).

- 556 14. Ozorowski, G. et al. Open and closed structures reveal allostery and pliability in the HIV-  
557 1 envelope spike. *Nature* **547**, 360-363 (2017).
- 558 15. Wang, H., Barnes, C.O., Yang, Z., Nussenzweig, M.C. & Bjorkman, P.J. Partially Open  
559 HIV-1 Envelope Structures Exhibit Conformational Changes Relevant for Coreceptor  
560 Binding and Fusion. *Cell Host Microbe* **24**, 579-592 e4 (2018).
- 561 16. Shaik, M.M. et al. Structural basis of coreceptor recognition by HIV-1 envelope spike.  
562 *Nature* **565**, 318-323 (2019).
- 563 17. Dobrowsky, T.M., Zhou, Y., Sun, S.X., Siliciano, R.F. & Wirtz, D. Monitoring early  
564 fusion dynamics of human immunodeficiency virus type 1 at single-molecule resolution. *J*  
565 *Virol* **82**, 7022-33 (2008).
- 566 18. Chang, M.I., Panorchan, P., Dobrowsky, T.M., Tseng, Y. & Wirtz, D. Single-molecule  
567 analysis of human immunodeficiency virus type 1 gp120-receptor interactions in living  
568 cells. *J Virol* **79**, 14748-55 (2005).
- 569 19. Frey, G. et al. A fusion-intermediate state of HIV-1 gp41 targeted by broadly neutralizing  
570 antibodies. *Proc Natl Acad Sci U S A* **105**, 3739-44 (2008).
- 571 20. Lai, R.P. et al. A fusion intermediate gp41 immunogen elicits neutralizing antibodies to  
572 HIV-1. *J Biol Chem* **289**, 29912-26 (2014).
- 573 21. Weissenhorn, W. et al. Structural basis for membrane fusion by enveloped viruses. *Mol*  
574 *Membr Biol* **16**, 3-9 (1999).
- 575 22. Weissenhorn, W., Dessen, A., Harrison, S.C., Skehel, J.J. & Wiley, D.C. Atomic structure  
576 of the ectodomain from HIV-1 gp41. *Nature* **387**, 426-30 (1997).
- 577 23. Chan, D.C., Fass, D., Berger, J.M. & Kim, P.S. Core structure of gp41 from the HIV  
578 envelope glycoprotein. *Cell* **89**, 263-73 (1997).
- 579 24. Caffrey, M. et al. Three-dimensional solution structure of the 44 kDa ectodomain of SIV  
580 gp41. *Embo J* **17**, 4572-84 (1998).
- 581 25. Chernomordik, L.V. & Kozlov, M.M. Membrane Hemifusion: Crossing a Chasm in Two  
582 Leaps. *Cell* **123**, 375-382 (2005).
- 583 26. Melikyan, G.B. et al. Evidence that the transition of HIV-1 gp41 into a six-helix bundle,  
584 not the bundle configuration, induces membrane fusion. *J Cell Biol* **151**, 413-23 (2000).
- 585 27. Markosyan, R.M., Cohen, F.S. & Melikyan, G.B. HIV-1 envelope proteins complete their  
586 folding into six-helix bundles immediately after fusion pore formation. *Mol Biol Cell* **14**,  
587 926-38 (2003).
- 588 28. Salzwedel, K., West, J.T. & Hunter, E. A conserved tryptophan-rich motif in the  
589 membrane-proximal region of the human immunodeficiency virus type 1 gp41  
590 ectodomain is important for Env-mediated fusion and virus infectivity. *J Virol* **73**, 2469-  
591 80 (1999).
- 592 29. Peisajovich, S.G., Epan, R.F., Pritsker, M., Shai, Y. & Epan, R.M. The polar region  
593 consecutive to the HIV fusion peptide participates in membrane fusion. *Biochemistry* **39**,  
594 1826-33 (2000).
- 595 30. Bellamy-McIntyre, A.K. et al. Functional links between the fusion peptide-proximal polar  
596 segment and membrane-proximal region of human immunodeficiency virus gp41 in  
597 distinct phases of membrane fusion. *J Biol Chem* **282**, 23104-16 (2007).
- 598 31. Shang, L., Yue, L. & Hunter, E. Role of the membrane-spanning domain of human  
599 immunodeficiency virus type 1 envelope glycoprotein in cell-cell fusion and virus  
600 infection. *J Virol* **82**, 5417-28 (2008).
- 601 32. Long, Y., Meng, F., Kondo, N., Iwamoto, A. & Matsuda, Z. Conserved arginine residue in  
602 the membrane-spanning domain of HIV-1 gp41 is required for efficient membrane fusion.  
603 *Protein Cell* **2**, 369-76 (2011).
- 604 33. Buzon, V. et al. Crystal structure of HIV-1 gp41 including both fusion peptide and  
605 membrane proximal external regions. *PLoS Pathog* **6**, e1000880 (2010).

- 606 34. Lutje Hulsik, D. et al. A gp41 MPER-specific llama VHH requires a hydrophobic CDR3  
607 for neutralization but not for antigen recognition. *PLoS Pathog* **9**, e1003202 (2013).
- 608 35. Shi, W. et al. Structural characterization of HIV gp41 with the membrane-proximal  
609 external region. *J Biol Chem* **285**, 24290-8 (2010).
- 610 36. Sun, Z.Y. et al. HIV-1 broadly neutralizing antibody extracts its epitope from a kinked  
611 gp41 ectodomain region on the viral membrane. *Immunity* **28**, 52-63 (2008).
- 612 37. Huang, J. et al. Broad and potent neutralization of HIV-1 by a gp41-specific human  
613 antibody. *Nature* **491**, 406-12 (2012).
- 614 38. Serrano, S. et al. Structure-Related Roles for the Conservation of the HIV-1 Fusion  
615 Peptide Sequence Revealed by Nuclear Magnetic Resonance. *Biochemistry* **56**, 5503-5511  
616 (2017).
- 617 39. Cerutti, N., Loredó-Varela, J.L., Caillat, C. & Weissenhorn, W. Antigp41 membrane  
618 proximal external region antibodies and the art of using the membrane for neutralization.  
619 (2017).
- 620 40. Apellaniz, B. et al. Cholesterol-dependent membrane fusion induced by the gp41  
621 membrane-proximal external region-transmembrane domain connection suggests a  
622 mechanism for broad HIV-1 neutralization. *J Virol* **88**, 13367-77 (2014).
- 623 41. Ofek, G. et al. Structure and mechanistic analysis of the anti-human immunodeficiency  
624 virus type 1 antibody 2F5 in complex with its gp41 epitope. *J Virol* **78**, 10724-37 (2004).
- 625 42. Pinto, D. et al. Structural Basis for Broad HIV-1 Neutralization by the MPER-Specific  
626 Human Broadly Neutralizing Antibody LN01. *Cell Host Microbe* **26**, 623-637 e8 (2019).
- 627 43. Yuan, M. et al. Conformational Plasticity in the HIV-1 Fusion Peptide Facilitates  
628 Recognition by Broadly Neutralizing Antibodies. *Cell Host Microbe* **25**, 873-883 e5  
629 (2019).
- 630 44. Kumar, S. et al. Capturing the inherent structural dynamics of the HIV-1 envelope  
631 glycoprotein fusion peptide. *Nat Commun* **10**, 763 (2019).
- 632 45. Benton, D.J., Gamblin, S.J., Rosenthal, P.B. & Skehel, J.J. Structural transitions in  
633 influenza haemagglutinin at membrane fusion pH. *Nature* **583**, 150-153 (2020).
- 634 46. Ladinsky, M.S. et al. Electron tomography visualization of HIV-1 fusion with target cells  
635 using fusion inhibitors to trap the pre-hairpin intermediate. *Elife* **9**(2020).
- 636 47. Blumenthal, R., Durell, S. & Viard, M. HIV entry and envelope glycoprotein-mediated  
637 fusion. *J Biol Chem* **287**, 40841-9 (2012).
- 638 48. Weissenhorn, W. et al. The ectodomain of HIV-1 env subunit gp41 forms a soluble, alpha-  
639 helical, rod-like oligomer in the absence of gp120 and the N-terminal fusion peptide.  
640 *EMBO J* **15**, 1507-14 (1996).
- 641 49. Li, Y. & Tamm, L.K. Structure and Plasticity of the Human Immunodeficiency Virus  
642 gp41 Fusion Domain in Lipid Micelles and Bilayers. *Biophys J.* **93**, 876-885 (2007).
- 643 50. Serrano, S. et al. Structure and immunogenicity of a peptide vaccine, including the  
644 complete HIV-1 gp41 2F5 epitope: implications for antibody recognition mechanism and  
645 immunogen design. *J Biol Chem* **289**, 6565-80 (2014).
- 646 51. Apellaniz, B., Huarte, N., Largo, E. & Nieva, J.L. The three lives of viral fusion peptides.  
647 *Chem Phys Lipids* **181**, 40-55 (2014).
- 648 52. Blattner, C. et al. Structural delineation of a quaternary, cleavage-dependent epitope at the  
649 gp41-gp120 interface on intact HIV-1 Env trimers. *Immunity* **40**, 669-80 (2014).
- 650 53. Kong, R. et al. Fusion peptide of HIV-1 as a site of vulnerability to neutralizing antibody.  
651 *Science* **352**, 828-33 (2016).
- 652 54. Han, X., Bushweller, J.H., Cafiso, D.S. & Tamm, L.K. Membrane structure and fusion-  
653 triggering conformational change of the fusion domain from influenza hemagglutinin. *Nat*  
654 *Struct Biol* **8**, 715-20 (2001).



- 655 55. Lai, A.L., Moorthy, A.E., Li, Y. & Tamm, L.K. Fusion activity of HIV gp41 fusion  
656 domain is related to its secondary structure and depth of membrane insertion in a  
657 cholesterol-dependent fashion. *J Mol Biol* **418**, 3-15 (2012).
- 658 56. Weiss, C.D. & White, J.M. Characterization of stable Chinese hamster ovary cells  
659 expressing wild-type, secreted, and glycosylphosphatidylinositol-anchored human  
660 immunodeficiency virus type 1 envelope glycoprotein. *J Virol* **67**, 7060-6 (1993).
- 661 57. Salzwedel, K., Johnston, P.B., Roberts, S.J., Dubay, J.W. & Hunter, E. Expression and  
662 characterization of glycopospholipid-anchored human immunodeficiency virus type 1  
663 envelope glycoproteins. *J Virol* **67**, 5279-88. (1993).
- 664 58. Kemble, G.W., Danieli, T. & White, J.M. Lipid-anchored influenza hemagglutinin  
665 promotes hemifusion, not complete fusion. *Cell* **76**, 383-391 (1994).
- 666 59. Munoz-Barroso, I., Salzwedel, K., Hunter, E. & Blumenthal, R. Role of the membrane-  
667 proximal domain in the initial stages of human immunodeficiency virus type 1 envelope  
668 glycoprotein-mediated membrane fusion. *J Virol* **73**, 6089-92 (1999).
- 669 60. Narasimhulu, V.G.S. et al. Distinct functions for the membrane-proximal ectodomain  
670 region (MPER) of HIV-1 gp41 in cell-free and cell-cell viral transmission and cell-cell  
671 fusion. *J Biol Chem* **293**, 6099-6120 (2018).
- 672 61. Louis, J.M. et al. Insights into the Conformation of the Membrane Proximal Regions  
673 Critical to the Trimerization of the HIV-1 gp41 Ectodomain Bound to Dodecyl  
674 Phosphocholine Micelles. *PLoS One* **11**, e0160597 (2016).
- 675 62. Reuven, E.M. et al. HIV-1 gp41 transmembrane domain interacts with the fusion peptide:  
676 implication in lipid mixing and inhibition of virus-cell fusion. *Biochemistry* **51**, 2867-78  
677 (2012).
- 678 63. Chen, J. et al. Mechanism of HIV-1 neutralization by antibodies targeting a membrane-  
679 proximal region of gp41. *J Virol* **88**, 1249-58 (2014).
- 680 64. Kwon, Y.D. et al. Surface-Matrix Screening Identifies Semi-specific Interactions that  
681 Improve Potency of a Near Pan-reactive HIV-1-Neutralizing Antibody. *Cell Rep* **22**, 1798-  
682 1809 (2018).
- 683 65. Rujas, E. et al. Functional Optimization of Broadly Neutralizing Hiv-1 Antibody 10e8 by  
684 Promoting Membrane Interactions. *J Virol* (2018).
- 685 66. Huarte, N. et al. The broadly neutralizing anti-human immunodeficiency virus type 1  
686 4E10 monoclonal antibody is better adapted to membrane-bound epitope recognition and  
687 blocking than 2F5. *J Virol* **82**, 8986-96 (2008).
- 688 67. Sun, Z.Y. et al. Disruption of helix-capping residues 671 and 674 reveals a role in HIV-1  
689 entry for a specialized hinge segment of the membrane proximal external region of gp41. *J*  
690 *Mol Biol* **426**, 1095-108 (2014).
- 691 68. Lee, J.H., Ozorowski, G. & Ward, A.B. Cryo-EM structure of a native, fully glycosylated,  
692 cleaved HIV-1 envelope trimer. *Science* **351**, 1043-8 (2016).
- 693 69. Rantalainen, K. et al. HIV-1 Envelope and MPER Antibody Structures in Lipid  
694 Assemblies. *Cell Rep* **31**, 107583 (2020).
- 695 70. Carravilla, P. et al. Molecular recognition of the native HIV-1 MPER revealed by STED  
696 microscopy of single virions. *Nat Commun* **10**, 78 (2019).
- 697 71. Shen, X. et al. Prolonged exposure of the HIV-1 gp41 membrane proximal region with  
698 L669S substitution. *Proc Natl Acad Sci U S A* **107**, 5972-7 (2010).
- 699 72. Williams, L.D. et al. Potent and broad HIV-neutralizing antibodies in memory B cells and  
700 plasma. *Sci Immunol* **2**(2017).
- 701 73. Rusert, P. et al. Divergent effects of cell environment on HIV entry inhibitor activity.  
702 *AIDS* **23**, 1319-27 (2009).

- 703 74. Hope, M.J., Bally, M.B., Webb, G. & Cullis, P.R. Production of large unilamellar vesicles  
704 by a rapid extrusion procedure: characterization of size distribution, trapped volume and  
705 ability to maintain a membrane potential. *Biochim Biophys Acta* **812**, 55-65 (1985).
- 706 75. Struck, D.K., Hoekstra, D. & Pagano, R.E. Use of resonance energy transfer to monitor  
707 membrane fusion. *Biochemistry* **20**, 4093-9 (1981).
- 708 76. Kabsch, W. Integration, scaling, space-group assignment and post-refinement. *Acta*  
709 *Crystallogr D Biol Crystallogr* **66**, 133-44 (2010).
- 710 77. Evans, P.R. & Murshudov, G.N. How good are my data and what is the resolution? *Acta*  
711 *Crystallogr D Biol Crystallogr* **69**, 1204-14 (2013).
- 712 78. Tickle, I.J. et al. STARANISO. (<http://staraniso.globalphasing.org/cgi-bin/staraniso.cgi>).  
713 *Cambridge, United Kingdom: Global Phasing Ltd.* (2018).
- 714 79. McCoy, A.J. et al. Phaser crystallographic software. *J Appl Crystallogr* **40**, 658-674  
715 (2007).
- 716 80. Emsley, P., Lohkamp, B., Scott, W.G. & Cowtan, K. Features and development of Coot.  
717 *Acta Crystallogr D Biol Crystallogr* **66**, 486-501 (2010).
- 718 81. Adams, P.D. et al. PHENIX: a comprehensive Python-based system for macromolecular  
719 structure solution. *Acta Crystallogr D Biol Crystallogr* **66**, 213-21 (2010).
- 720 82. Morin, A. et al. Collaboration gets the most out of software. *Elife* **2:e01456**(2013).
- 721 83. Brugger, B. et al. The HIV lipidome: a raft with an unusual composition. *Proc Natl Acad*  
722 *Sci U S A* **103**, 2641-6 (2006).
- 723 84. Jo, S., Kim, T., Iyer, V.G. & Im, W. CHARMM-GUI: a web-based graphical user  
724 interface for CHARMM. *J Comput Chem* **29**, 1859-65 (2008).
- 725 85. Wu, E.L. et al. CHARMM-GUI Membrane Builder toward realistic biological membrane  
726 simulations. *J Comput Chem* **35**, 1997-2004 (2014).
- 727 86. Phillips, J.C. et al. Scalable molecular dynamics with NAMD. *J Comput Chem* **26**, 1781-  
728 802 (2005).
- 729 87. MacKerell, A.D. et al. All-atom empirical potential for molecular modeling and dynamics  
730 studies of proteins. *J Phys Chem B* **102**, 3586-616 (1998).
- 731 88. Klauda, J.B. et al. Update of the CHARMM all-atom additive force field for lipids:  
732 validation on six lipid types. *J Phys Chem B* **114**, 7830-43 (2010).
- 733 89. Best, R.B. et al. Optimization of the additive CHARMM all-atom protein force field  
734 targeting improved sampling of the backbone phi, psi and side-chain chi(1) and chi(2)  
735 dihedral angles. *J Chem Theory Comput* **8**, 3257-3273 (2012).
- 736 90. Jorgensen, W.L., Chandrasekhar, J., Madura, J.D., Impey, R.W. & Klein, M.L.  
737 Comparison of simple potential functions for simulating liquid water. *J. Chem. Phys.* **79**,  
738 926-935 (1983).
- 739 91. Feller, S.E., Zhang, Y.H., Pastor, R.W. & Brooks, B.R. Constant pressure molecular  
740 dynamics simulations – The Langevin piston method. *J. Chem. Phys.* 1995, 103,  
741 4613-4621. *J. Chem. Phys.* **103**, 4613-4621 (1995).
- 742 92. Darden, T., York, D. & Pedersen, L. Particle mesh Ewald: An N•log(N) method for  
743 Ewald sums in large systems. *J. Chem. Phys.* **98**, 10089-10092 (1993).
- 744 93. Hopkins, C.W., Le Grand, S., Walker, R.C. & Roitberg, A.E. Long-Time-Step Molecular  
745 Dynamics through Hydrogen Mass Repartitioning. *J Chem Theory Comput* **11**, 1864-74  
746 (2015).
- 747 94. Tuckerman, M.E., Berne, B.J. & Martyna, G.J. Reversible multiple time scale molecular  
748 dynamics. *J. Chem. Phys.* **97**, 1990-2001 (1992).
- 749 95. Andersen, H.C. Rattle: a “velocity” version of the shake algorithm for molecular dynamics  
750 calculations. *J. Comput. Phys.* **52**, 24-34 (1983).



- 751 96. Ryckaert, J.-P., Ciccotti, G. & Berendsen, H.J.C. Numerical integration of the cartesian  
752 equations of motion of a system with constraints: molecular dynamics of n-alkanes. *J.*  
753 *Comput. Phys.* **23**, 327–341. *J Comput Phys* **23**, 327–341 (1977).
- 754 97. Miyamoto, S. & Kollman, P.A. SETTLE: An analytical version of the SHAKE and  
755 RATTLE algorithms for rigid water models. . *J. Comput. Chem.* **13**, 952–962 (1992).
- 756 98. Li, Z. et al. Subnanometer structures of HIV-1 envelope trimers on aldrithiol-2-inactivated  
757 virus particles. *Nat Struct Mol Biol* **27**, 726-734 (2020).
- 758
- 759

## 760 **Acknowledgement**

761 W.W. acknowledges support from the Institute Universitaire de France (IUF), from the European  
762 Union's Horizon 2020 research and innovation programme under grant agreement No. 681137,  
763 H2020 EAVI and the platforms of the Grenoble Instruct-ERIC center (IBS and ISBG; UMS 3518  
764 CNRS-CEA-UGA-EMBL) within the Grenoble Partnership for Structural Biology (PSB). Platform  
765 access was supported by FRISBI (ANR-10-INBS-05-02) and GRAL, a project of the University  
766 Grenoble Alpes graduate school (Ecoles Universitaires de Recherche) CBH-EUR-GS (ANR-17-  
767 EURE-0003). J.L.N. acknowledges funding from Spanish MINECO (BIO2015-64421-R;  
768 MINECO/AEI/FEDER, UE), Spanish MCIU (RTI2018-095624-B-C21; MCIU/AEI/FEDER, UE)  
769 and Basque Government (IT1196-19). We thank Miriam Hock and Serafima Guseva for previous  
770 contributions to the project, the ESRF-EMBL Joint Structural Biology Group for access and support  
771 at the ESRF beam lines, J. Marquez (EMBL) from the HTX crystallization facility, C. Mas and J.-  
772 B. Reiser for assistance on ISBG platforms.

773

774 **Author Contributions:** W.W. conceived and designed the study. J.L.N. supervised the lipid  
775 mixing experiments performed by J.T. A.T. supervised neutralization assays performed by N.F.  
776 C.C. and F.D. performed molecular dynamics simulation experiments. D.G. produced proteins,  
777 mutants and performed crystallization and pull-down experiments. C.Ca. performed the structural  
778 studies and interaction studies. W.W. wrote the manuscript with input from all authors.

779

780 **Competing interests:** The authors declare no competing interests.

781

782 **Figures and Tables**

783

784 **Table 1.** Pseudovirus neutralization by 2H10, 2H10-F, 2H10-RKRF and bi-2H10. IC50s are

785 indicated in  $\mu\text{g/ml}$ .

786

|                    | <b>Tier</b> | <b>2H10 wt</b> | <b>2H10-F</b> | <b>2H10-RKRF</b> | <b>Bi-2H10</b> | <b>2F5</b> | <b>VRC01</b> |
|--------------------|-------------|----------------|---------------|------------------|----------------|------------|--------------|
| <b>NL4-3</b>       | 1           | 25.20          | 18.68         | 9.15             | 1.84           | 0.16       | 0.20         |
| <b>MN-3</b>        | 1           | >50.00         | 30.38         | 9.36             | 1.39           | 0.03       | 0.06         |
| <b>BaL.26</b>      | 1           | >50.00         | 19.38         | 9.63             | 6.05           | 1.21       | 0.13         |
| <b>SF162</b>       | 1a          | >50.00         | >50.00        | 25.19            | 6.14           | 1.22       | 0.39         |
| <b>SF162P3</b>     | 2           | 22.04          | 13.14         | 6.76             | 1.32           | 1.96       | 0.24         |
| <b>SC422661.8</b>  | 2           | >50.00         | >50.00        | 27.93            | 3.79           | 1.00       | 0.27         |
| <b>JR-FL</b>       | 2           | 44.65          | 16.93         | 6.95             | 1.49           | 0.97       | 0.11         |
| <b>JR-CSF</b>      | 2           | >50.00         | 21.66         | 10.85            | 2.85           | 1.24       | 0.37         |
| <b>QH0692.42</b>   | 2           | >50.00         | >50.00        | >50.00           | >50.00         | 1.20       | 1.21         |
| <b>THRO4156.18</b> | 2           | >50.00         | >50.00        | >50.00           | >50.00         | >50.00     | 3.84         |

787

788

789

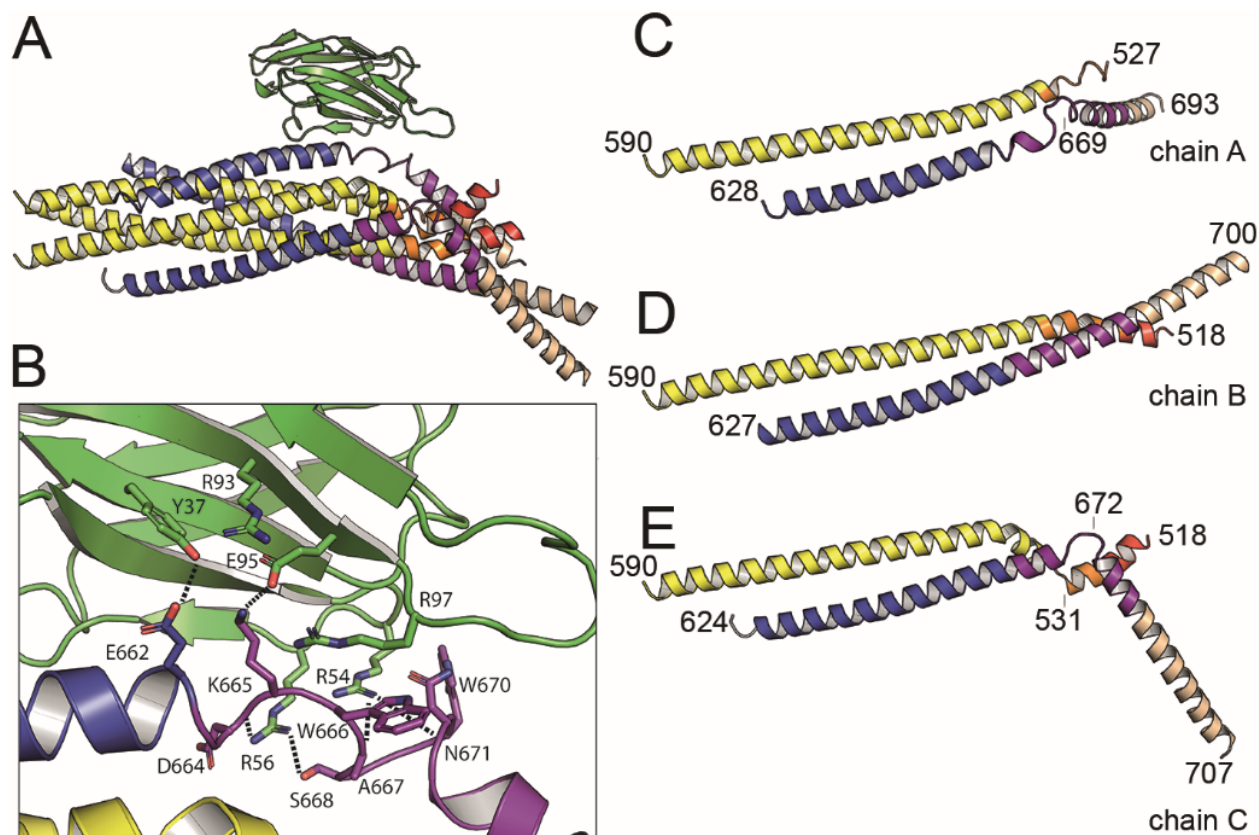

**Fig. 1. Crystal structure of gp41FP-TM in complex with 2H10.**

**A**, Ribbon presentation of gp41TM-FP in complex with 2H10. Color-coding of the different segments is as indicated in the gp41 scheme (Fig. S1A), the 2H10 nanobody is colored in green.

**B**, Close-up of the interaction of gp41FP-TM with 2H10. Residues in close enough contact to make polar interactions are shown as sticks.

**C, D, E**, Ribbon diagram of the individual protomers named chain A, B and C. Residues within the FPPR and MPER hinge regions are indicated.

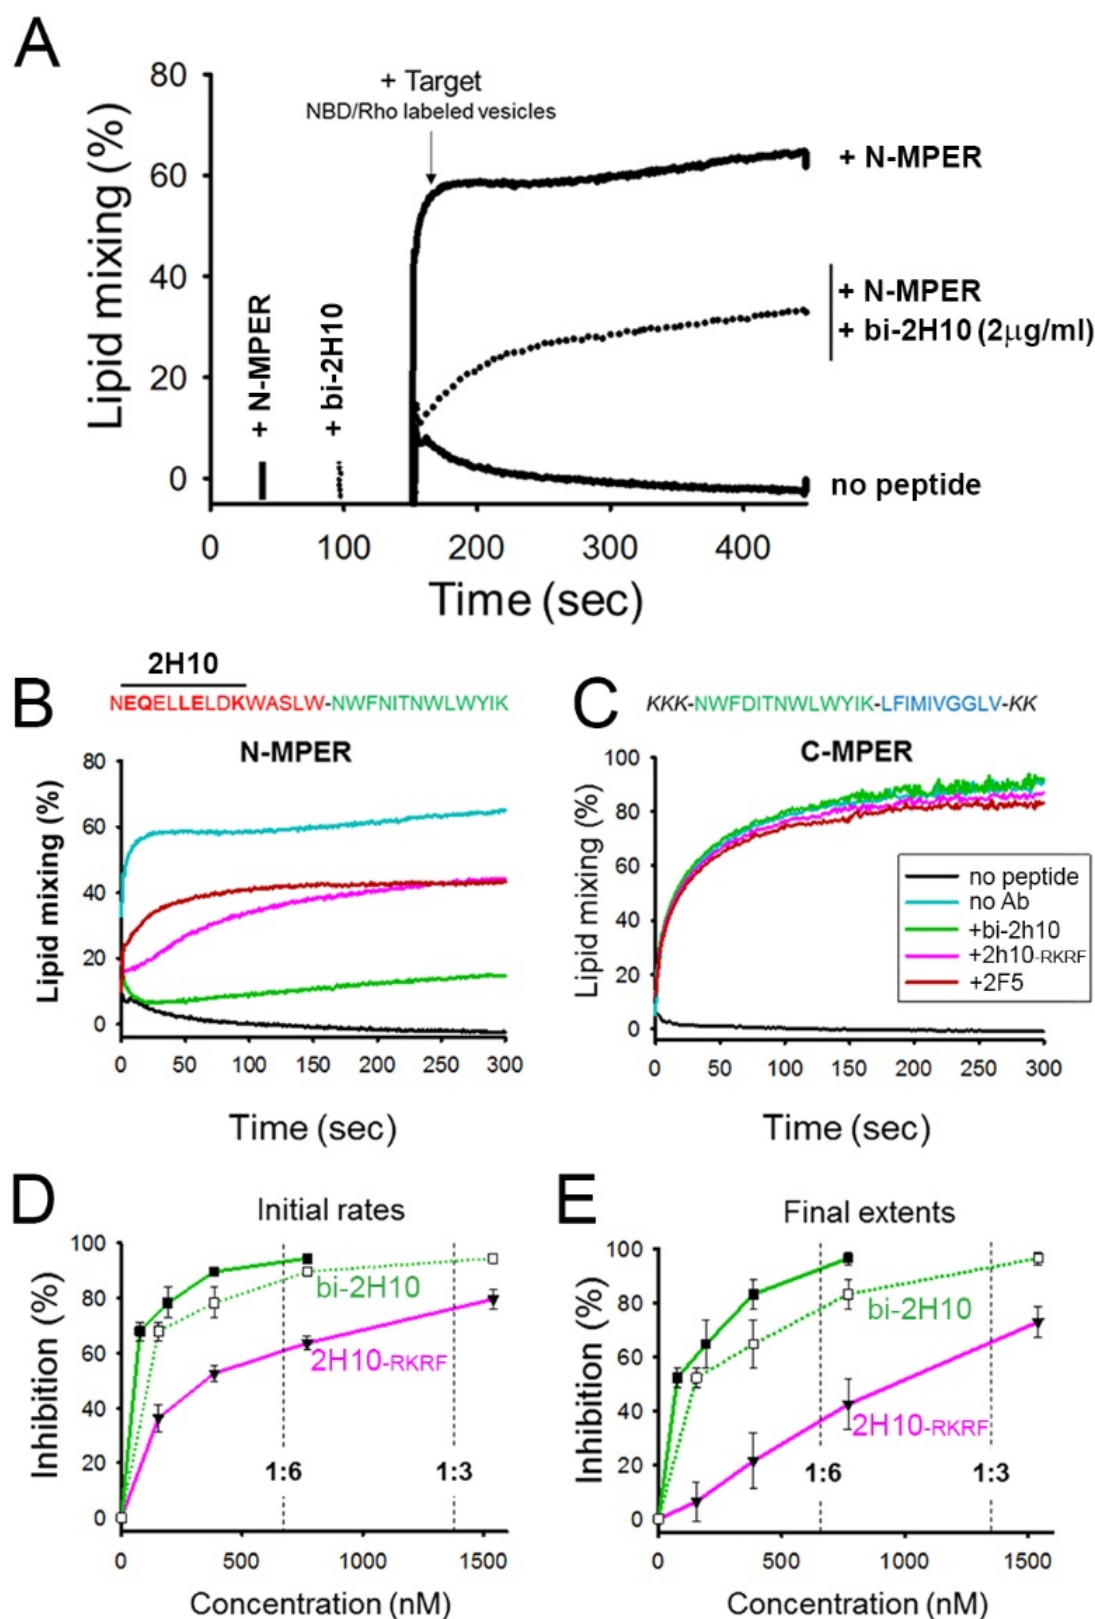

**Fig. 2. Vesicle-vesicle fusion inhibition by 2H10, bi-2H10 and 2F5.**

(A) Time course of the lipid-mixing assay using fusion-committed vesicles. At time 30 sec ('+N-MPER'), peptide (4  $\mu$ M) was added to a stirring solution of unlabeled vesicles (90  $\mu$ M lipid), and,

804 after 120 sec (indicated by the arrow), the mixture was supplemented with N-NBD-PE/N-Rh-PE-  
805 labeled vesicles (10  $\mu$ M lipid). The increase in NBD fluorescence over time follows the dilution of  
806 the probes upon mixing of lipids of target and primed vesicles (+N-MPER trace). NBD increase  
807 was substantially diminished in samples incubated with bi-2H10 (2  $\mu$ g/ml) prior to the addition of  
808 the target vesicles (+bi-2H10, dotted trace), and totally absent if unlabeled vesicles were devoid of  
809 peptide ('no peptide' trace).

810 **(B)** Left: Kinetic traces of N-MPER-induced lipid-mixing comparing the blocking effects of 2H10-  
811 RKRF, bi-2H10 and Fab 2F5.

812 **(C)** Absence of effects on lipid-mixing when vesicles were primed for fusion with the C-MPER  
813 peptide, devoid of 2H10 and 2F5 epitope sequences. Antibody concentrations were 20  $\mu$ g/ml in  
814 these assays.

815 **(D)** Dose-response plots comparing the inhibitory capacities of 2H10-RKRF and bi-2H10 (purple  
816 and green traces, respectively). Levels of lipid-mixing 20 or 300 sec after target vesicle injection  
817 were measured (initial rates **D** and final extents, **E**) and percentages of inhibition calculated as a  
818 function of the Ab concentration. The dotted line and empty symbols correspond to the effect of bi-  
819 2H10 when the concentration of the component 2H10 was plotted. The slashed vertical lines mark  
820 the 2H10-to-peptide ratios of 1:6 and 1:3. Plotted values are means $\pm$ SD of three independent  
821 experiments.

822



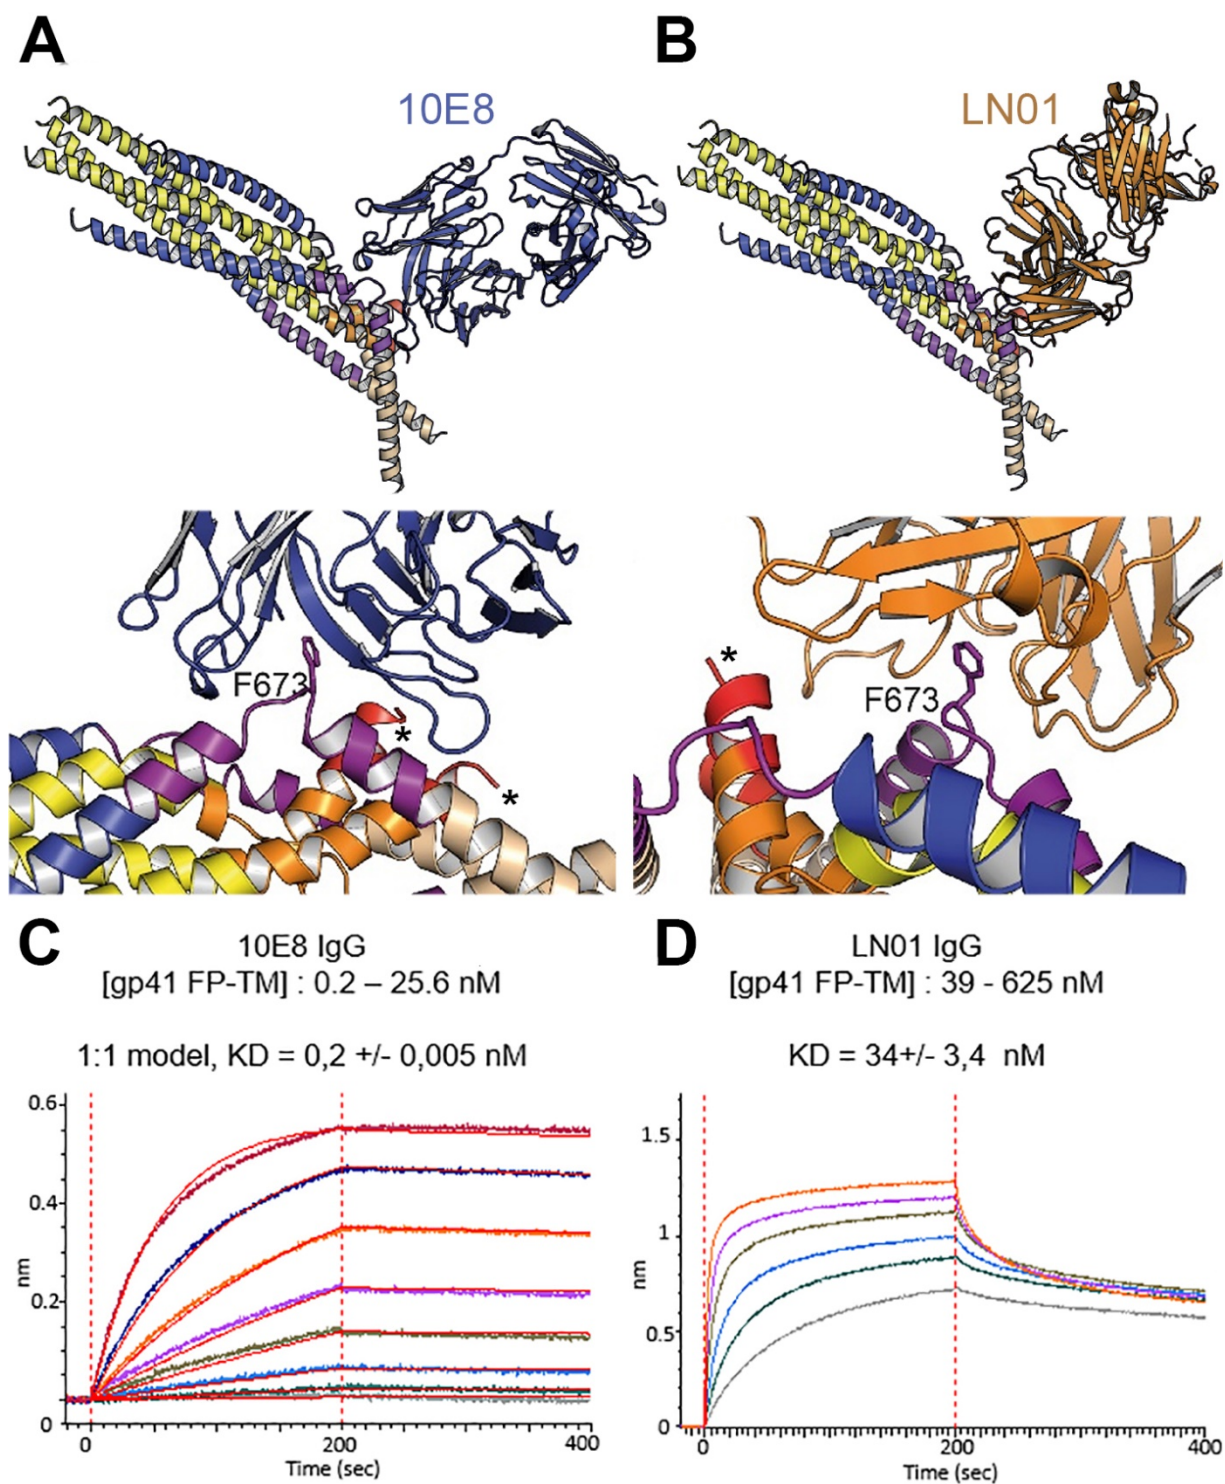

823

824

**Fig. 3. Gp41FP-TM interaction with bnAbs LN01 and 10E8**

825

**A**, *Ca* superposition of the MPER peptide structure in complex with LN01 (pdb 6snd) onto chain

826

C-C of gp41FP-TM-2H10 structure. The lower panel shows a close-up of the interaction oriented

827

with respect to gp41 F673.



828 **B**, *Ca* superposition of the MPER peptide structure in complex with 10E8 (pdb 5iq7) onto the  
829 corresponding chain C-C of gp41FP-TM. The lower panel shows a close-up of the interaction in  
830 the same orientation as in A.

831 **C**, Bio-layer interferometry (BLI) binding of gp41FP-TM to 10E8 and **D**, to LN01. 10E8 binding  
832 was fit to 1:1 model and for LN01 a steady state model was employed for fitting the data. For 10E8  
833 binding, gp41FP-TM was used at concentrations from 0.2 to 25,6 nM and for LN01 binding  
834 gp41FP-TM concentrations ranged from 39 to 625 nM.

835

836

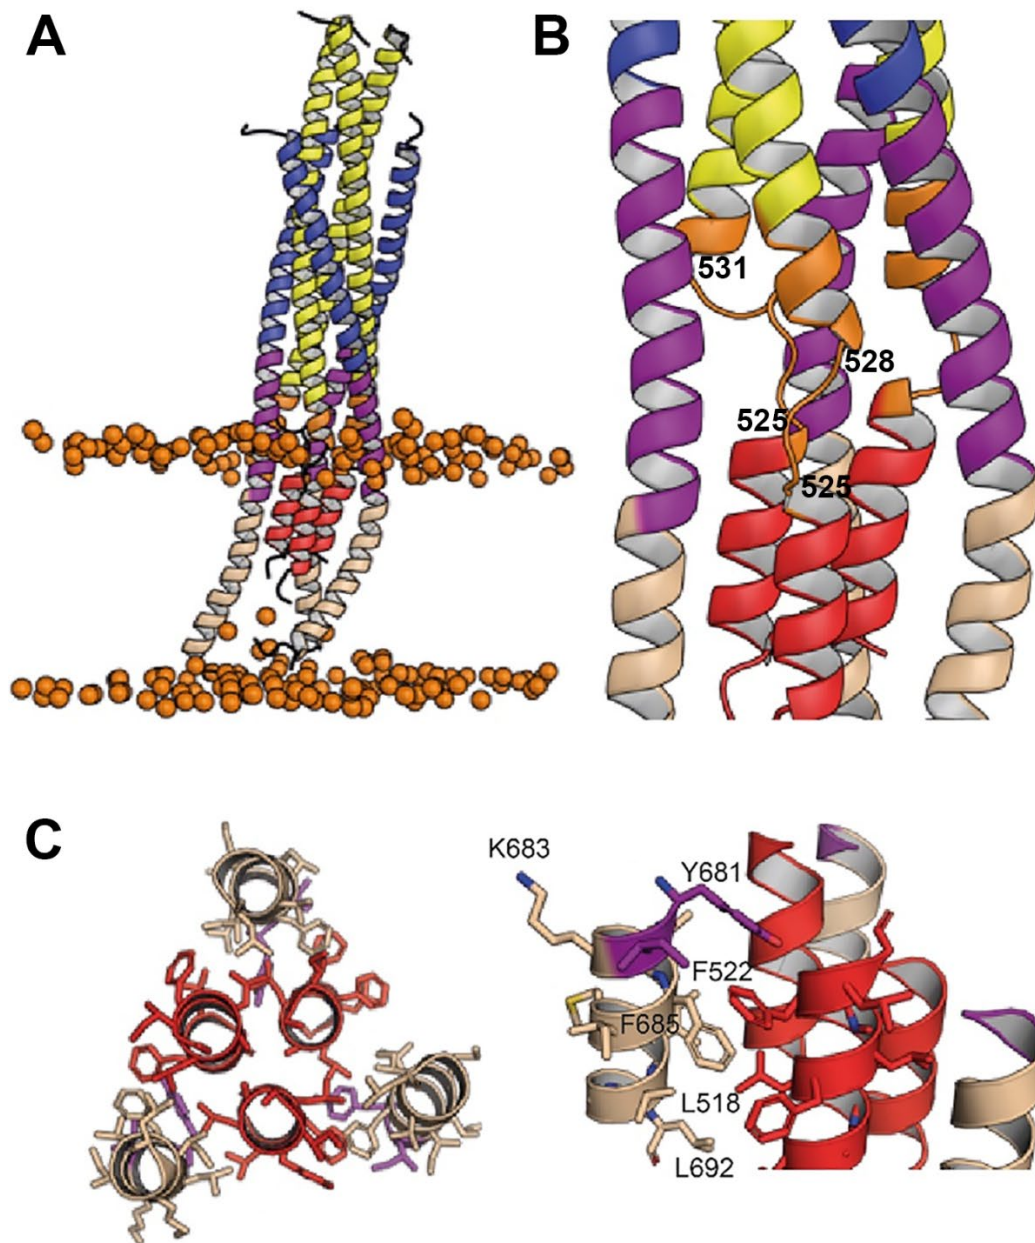

837

838 **Fig. 4. Interactions within the final post fusion conformation of gp41FP-TM modeled by MD.**

839 **A,** Model of gp41FP-TM (Fig. S7C) after 1 $\mu$ s MD simulation in a bilayer. Phosphate groups of the  
840 phospholipids are shown as orange spheres to delineate the membrane boundaries.

841 **B,** Close up on the MPER and FPPR flexible regions.

842 **C,** Close-up of the interaction of FP (residues 514-524) and TM (residues 681-692) viewed along  
843 the three-fold axis from the N-terminus indicating an intricate network of hydrophobic interactions  
844 (left panel) and from the side (right panel). Interacting side chains are labeled and shown as sticks.

845

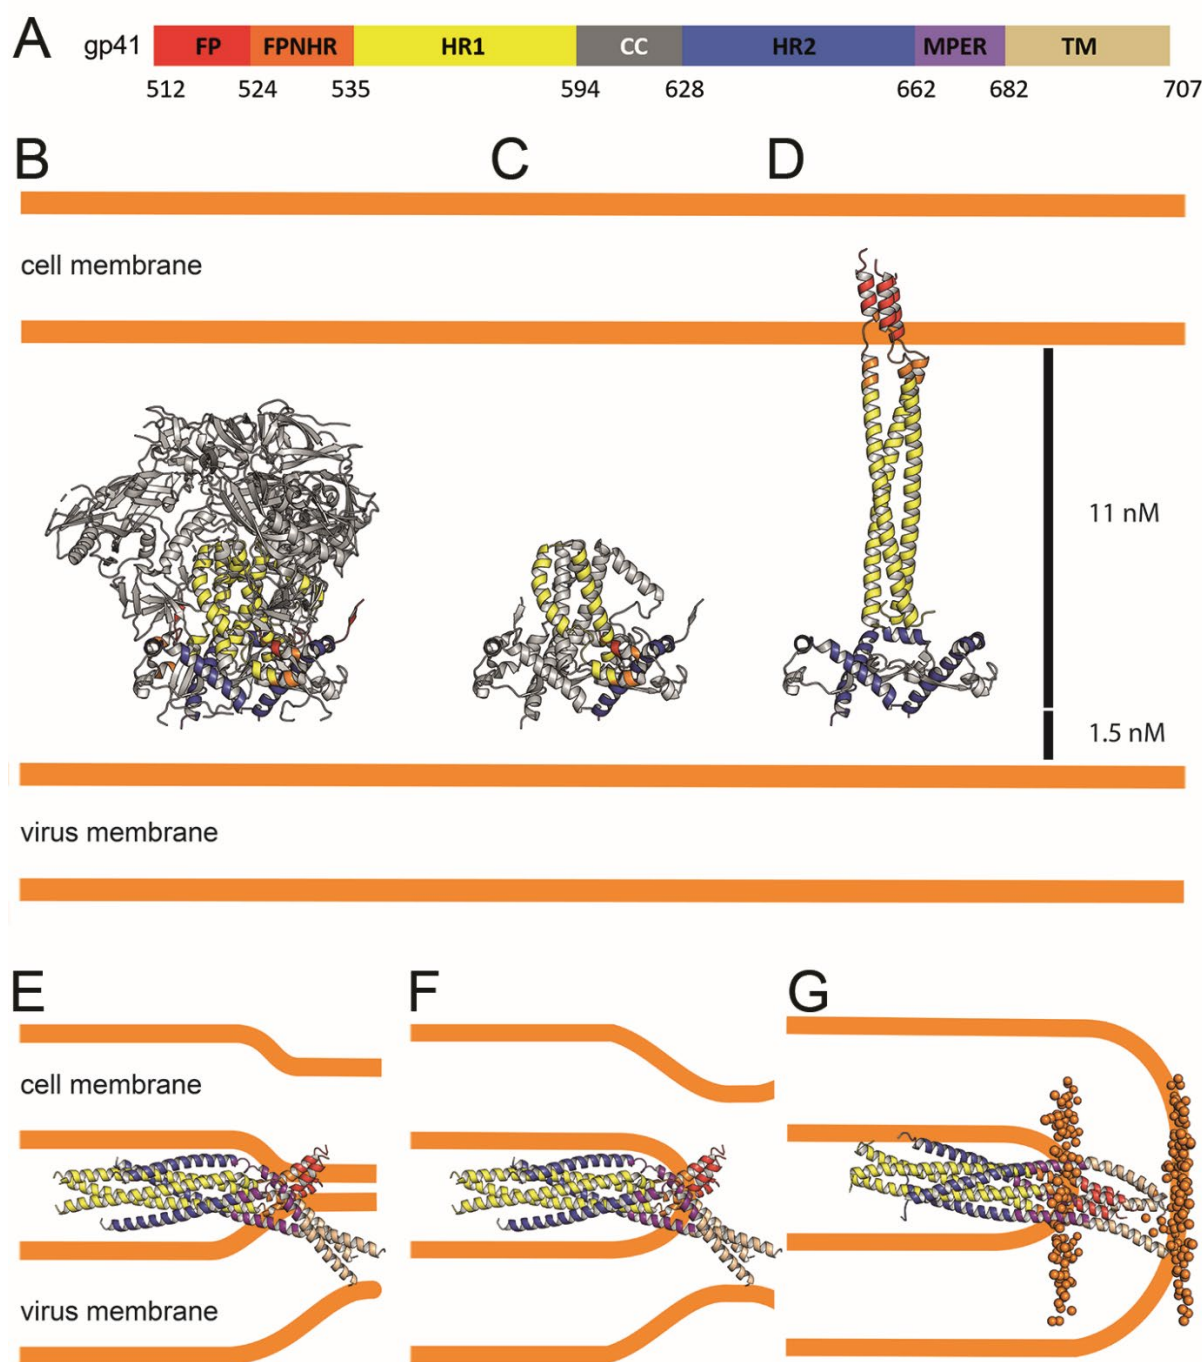

846

847

848

849

850

851

852

853

**Fig. 5. Conformational transitions of gp41 that lead to membrane apposition and membrane fusion.**

**A**, Representation of the different domains of gp41 with the residue numbers delimiting each domain as indicated. The same color code has been used in all the figures.

**B**, Ribbon presentation of the Env prefusion conformation (pdb 5fuu), gp41 is constrained by gp120 in its native conformation. The structure of native gp41 lacks the MPER and TM regions. MPER is spanning a distance of 1.5 nm<sup>98</sup>.

854 **C**, Ribbon of native gp41, one chain is colored according to the scheme in A and the other two chains  
855 are shown in grey.

856 **D**, Binding to cellular receptors CD4 and subsequently to CXCR4/CCR5 induces a series of  
857 conformational changes that eventually leads to the dissociation of gp120. During this process,  
858 HR1, FPPR and FP will form a long triple stranded coiled coil extending 11 nm towards the target  
859 cell membrane. In a first step HR2 may keep its prefusion conformation in analogy to a similar  
860 intermediate, activated influenza virus HA structure<sup>45</sup>. Alternatively, HR2 may dissociate and form  
861 a more extended conformation in agreement with locked gp41 structures bridging viral and cellular  
862 membranes that bridge distances of 11 to 15 nm<sup>46</sup>.

863 **E**, Bending of HR1 and HR2 will result in the six-helical bundle core structure bringing cellular  
864 and viral membranes into close apposition with the 3 FPs anchored in the cellular membrane and  
865 the 3 TMs anchored in the viral membrane, the gp41 conformation represented by the gp41FP-TM  
866 structure. This intermediate gp41 conformation may have brought both membranes into close  
867 apposition or may have already induced hemifusion as indicated in F.

868 **G**, Further reordering of FPPR-FP and MPER-TM results in the final extremely stable post fusion  
869 conformation. This thus suggests that rearrangement of the membrane anchors plays crucial roles in  
870 lipid mixing, breaking the hemifusion diaphragm to allow fusion pore opening. Boundaries of the  
871 lipid layers are shown with orange spheres representing the phosphate atoms of the lipids present  
872 in the MD simulation (snapshot taken after 1  $\mu$ s MD simulation).
